# Supplementary material
Source: ML conference proceedings conference paper supplement (https://openreview.net/forum?id=l3sVYvqtfZ)

leiden

spatial2

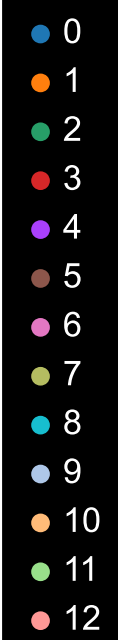

spatial1

Supplement: supplementary_material [file spatial_xenium_spatial.pdf › STBPE_Xenium_results/spatial_xenium_spatial.pdf]

leiden

UMAP2

- 0
- 1
- 2
- 3
- 4
- 5
- 6
- 7
- 8
- 9
- 10
- 11
- 12

UMAP1

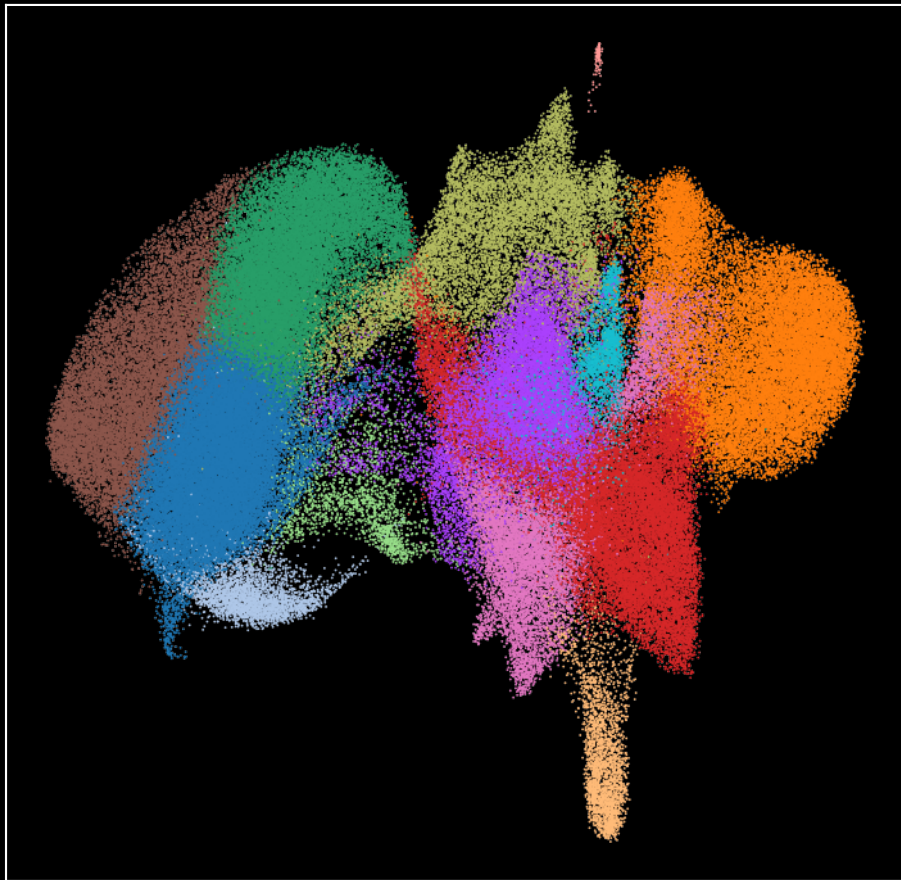

Supplement: supplementary_material [file umap_xenium_leiden.pdf › STBPE_Xenium_results/umap_xenium_leiden.pdf]
